# Supplementary material for: Thinning Effect of C Sequestration along an Elevation Gradient of Mediterranean Pinus spp. Plantations
Source: MDPI journal article supplement (doi:10.3390/f12111583), 2021-11-17
Supplement: s1 [file s1]

## Supplementary Material

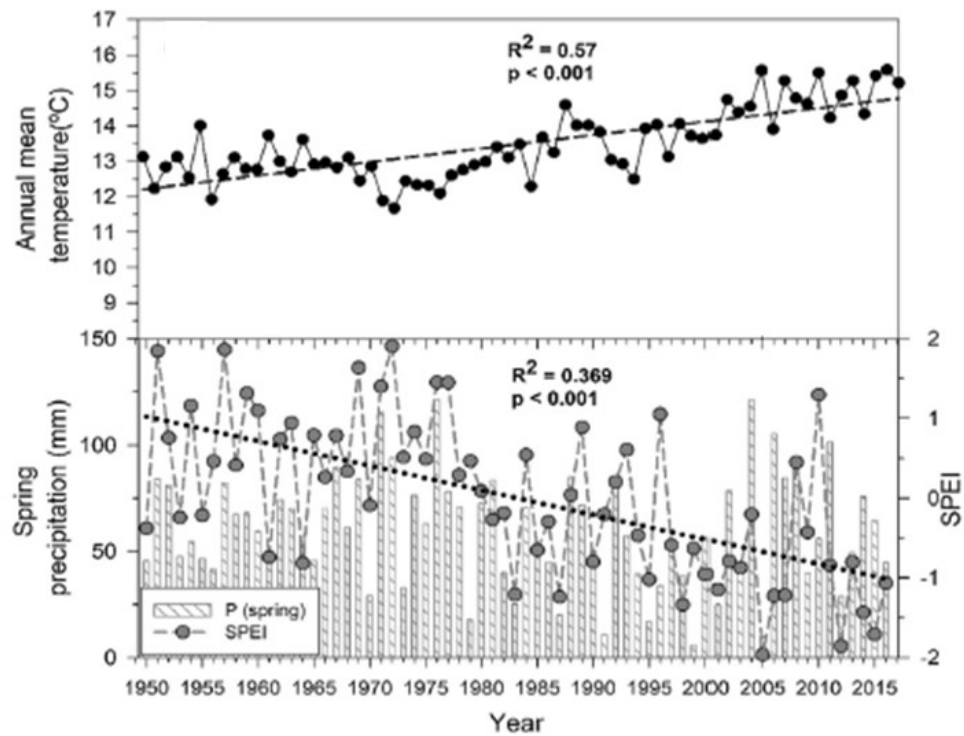

**Figure S1.** (Above) Historic climate characterization of the study considering mean annual temperature (T); (Below) spring precipitation (P) and the annual standardized precipitation evapotranspiration index (SPEI) for the 1950-2016 period ( $r^2$  and  $P$  correspond to annual temperature and the SPEI statistics).

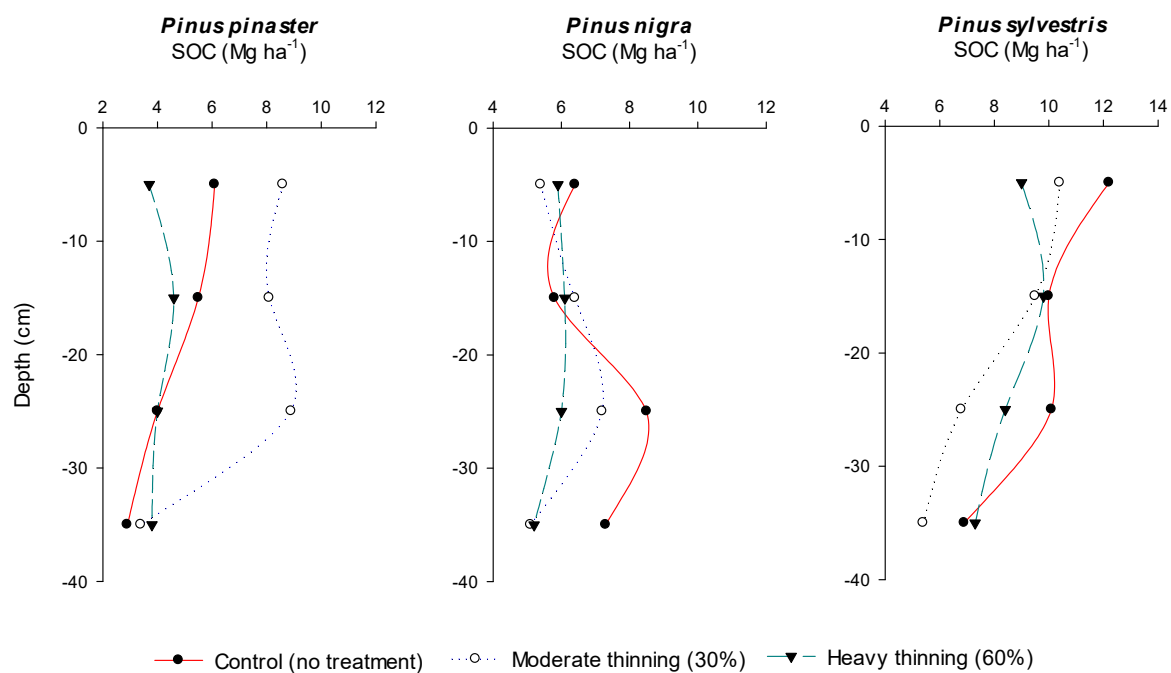

**Figure S2.** Depth distribution of SOC (Mg C ha<sup>-1</sup>) by species and grade of thinning. Control or unthinned plots (0% of BA removed), moderate plots (30% of BA removed) and heavy plots (60% of BA removed) at S<sup>a</sup> de Los Filabres (Almeria, Spain).

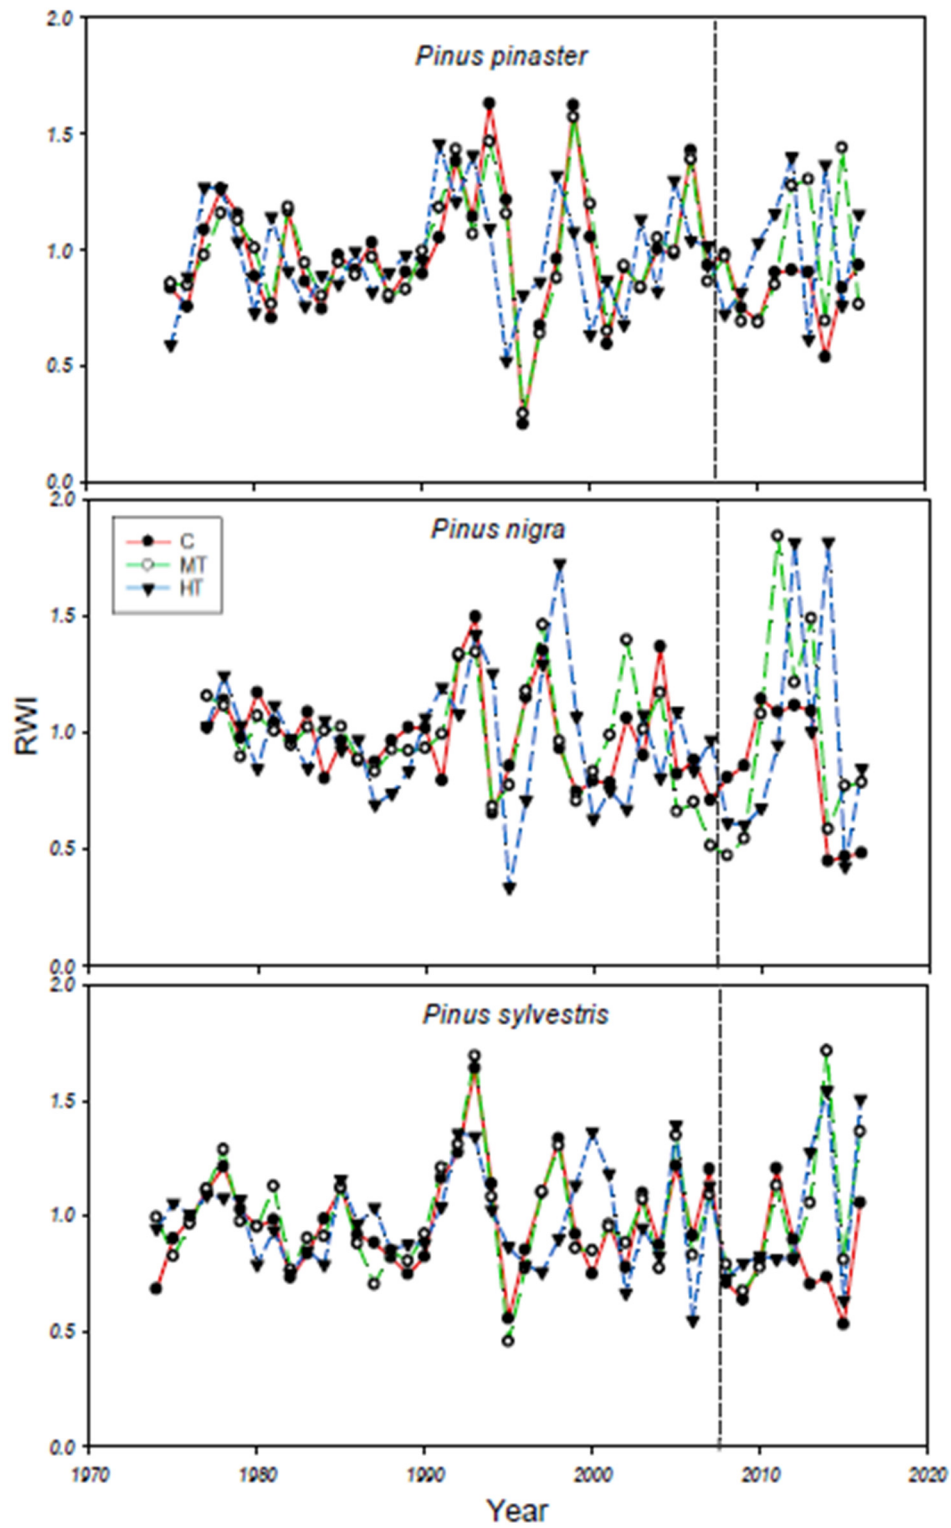

**Figure S3.** Chronologies of growth index (RWI) for *Pinus pinaster*, *Pinus nigra* and *Pinus sylvestris*. The vertical, dashed lines correspond to the 2008 thinning year. Treatments: C—control (0% BA removed); MT—moderate thinning (30% BA removed); HT—heavy thinning (60% BA removed).

**Table S1.** Selected biomass models for *Pinus* spp.  $W_s$ : biomass weight of the stem fraction;  $W_{b7}$ : biomass weight of the thick branch fraction with a diameter greater than 7 cm;  $W_{b2-7}$ : biomass weight of the medium branch fraction with a diameter between 2 and 7 cm;  $W_{b2+n}$ : biomass weight of the thin branch fraction with a diameter smaller than 2 cm, with needles;  $W_r$ : biomass weight of the belowground fraction (all in kg);  $d$  = dbh (cm);  $h$  = tree height (m). Equations were indexed by compartments for stem biomass (1), thick branches (2), medium branches (3), thin branches + needles (4) and roots (5).

| <i>Pinus pinaster</i>                          | <i>Pinus nigra</i>                                                                                             | <i>Pinus sylvestris</i>                                                                                                                            | Equation |
|------------------------------------------------|----------------------------------------------------------------------------------------------------------------|----------------------------------------------------------------------------------------------------------------------------------------------------|----------|
| $W_s = 0.0278 \cdot d^{1.923} \cdot h^{0.618}$ | $W_s = 0.0403 \cdot d^{1.838} \cdot h^{0.945}$                                                                 | $W_s = 0.0154 \cdot d^2 \cdot h$                                                                                                                   | (1)      |
| $W_{b7} + W_{b27} = 0.000381 \cdot d^{3.141}$  | $W_{b7} = [0.228 \cdot (d - 32.5)^2] \cdot Z$<br>If $d \leq 32.5$ cm then $Z=0$<br>If $d > 32.5$ cm then $Z=1$ | $W_{b7} = [0.540 \cdot (d - 37.5)^2 - 0.0119 \cdot (d - 37.5)^2 \cdot h] \cdot Z$<br>If $d \leq 37.5$ cm then $Z=0$<br>If $d > 37.5$ cm then $Z=1$ | (2)      |
|                                                | $W_{b2-7} = 0.0521 \cdot d^2$                                                                                  | $W_{b2-7} = 0.0295 \cdot d^{2.742} \cdot h^{-0.899}$                                                                                               | (3)      |
| $W_{b2+n} = 0.0129 \cdot d^{2.320}$            | $W_{b2+n} = 0.0720 \cdot d^2$                                                                                  | $W_{b2+n} = 0.530 \cdot d^{2.199} \cdot h^{-1.153}$                                                                                                | (4)      |
| $W_r = 0.00444 \cdot d^{2.804}$                | $W_r = 0.0189 \cdot d^{2.445}$                                                                                 | $W_r = 0.130 \cdot d^2$                                                                                                                            | (5)      |

**Table S2.** ANOVA comparison of species with SOC distribution across horizons and total depth at S<sup>a</sup> de Los Filabres (Almeria, Spain). Significant differences indicated by  $p < 0.05$  and no significant differences by  $p > 0.05$ .

| Species                 | Depth (cm)   | F    | p     |
|-------------------------|--------------|------|-------|
| <i>Pinus pinaster</i>   | 0–10         | 7.81 | 0.005 |
|                         | 10–20        | 3.21 | 0.002 |
|                         | 20–30        | 5.18 | 0.053 |
|                         | 30–40        | 0.36 | 0.011 |
|                         | <b>Total</b> | 6.39 | 0.700 |
| <i>Pinus nigra</i>      | 0–10         | 0.68 | 0.510 |
|                         | 10–20        | 0.31 | 0.732 |
|                         | 20–30        | 2.16 | 0.122 |
|                         | 30–40        | 3.83 | 0.026 |
|                         | <b>Total</b> | 1.89 | 0.158 |
| <i>Pinus sylvestris</i> | 0–10         | 1.59 | 0.209 |
|                         | 10–20        | 0.07 | 0.931 |
|                         | 20–30        | 6.44 | 0.003 |
|                         | 30–40        | 1.40 | 0.252 |
|                         | <b>Total</b> | 1.23 | 0.297 |

**Table S3.** ANOVA multiple comparisons of total SOC for the studied species among treatments. Control (0%), moderate thinning (30%) and heavy thinning (60%) at S<sup>a</sup> de Los Filabres (Almeria, Spain). Significant differences indicated by  $p < 0.05$  and no significant differences by  $p > 0.05$ .

| Specie                  | Control (0%) | Moderate thinning (30%) | Heavy thinning (60%) |
|-------------------------|--------------|-------------------------|----------------------|
| <i>Pinus pinaster</i>   | a            | ab                      | a                    |
| <i>Pinus nigra</i>      | a            | a                       | a                    |
| <i>Pinus sylvestris</i> | b            | b                       | b                    |
| F                       | 10.93        | 3.25                    | 17.71                |
| <i>p</i>                | 0.000        | 0.045                   | 0.000                |

**Table S4.** ANOVA comparison and post hoc analysis of standard BAI<sub>n</sub>, BAI pre- and post-thinning year against treatments (C, control; MT, moderate thinning; HT, heavy thinning at S<sup>a</sup> de Los Filabres (Almeria, Spain). Significant differences indicated by  $p < 0.05$  and no significant differences by  $p > 0.05$ . \*  $p < 0.05$ , \*\*  $p < 0.01$ .

| Specie                  | BAI                  | F     | <i>p</i> | <i>p</i> | <i>p</i> | <i>p</i>  |
|-------------------------|----------------------|-------|----------|----------|----------|-----------|
|                         |                      |       |          | C vs. MT | C vs. HT | MT vs. HT |
| <i>Pinus pinaster</i>   | BAI <sub>n</sub>     | 1.431 | 0.243    | -        | -        | -         |
|                         | BAI <sub>preT</sub>  | 1.424 | 0.246    | -        | -        | -         |
|                         | BAI <sub>postT</sub> | 1.861 | 0.180    | -        | -        | -         |
| <i>Pinus nigra</i>      | BAI <sub>n</sub>     | 0.510 | 0.602    | -        | -        | -         |
|                         | BAI <sub>preT</sub>  | 1.773 | 0.175    | -        | -        | -         |
|                         | BAI <sub>postT</sub> | 2.090 | 0.150    | -        | -        | -         |
| <i>Pinus sylvestris</i> | BAI <sub>n</sub>     | 4.691 | 0.010*   | 0.040    | 0.919    | 0.016     |
|                         | BAI <sub>preT</sub>  | 3.151 | 0.046*   | 0.062    | 0.967    | 0.107     |
|                         | BAI <sub>postT</sub> | 7.082 | 0.004**  | 0.849    | 0.005    | 0.019     |
