# Supplementary material for: Thinning Effect of C Sequestration along an Elevation Gradient of Mediterranean Pinus spp. Plantations
Source: MDPI journal article supplement (doi:10.3390/f12111583), 2021-11-17
Supplement: s1 [file s1]

Archive with 1 entries (1 files):
- forests-1439331-supplementary.pdf
